# Supplementary material
Source: PubMed Central journal article supplement (PMC5786461)
Supplement: BPH-175-618-s001.pdf [file BPH-175-618-s001.pdf]

## Supplementary material

### Rat telemetry study design

AZ1 was dosed at 10 (single dose), 100 (daily dosing for three days) and 450 mg/kg (single dose).

Regorafenib was dosed at 8 and 16 mg/kg (daily dosing for three days). The study design is outlined in Table 1. In Speed *et al.*, rat PK was performed at 15 mg/kg sunitinib (single dose) and in Engle *et al.*, rat telemetry was performed at 5 and 50 mg/kg (daily dosing for three days) (Engle & Watson, 2016; Speed *et al.*, 2012).

**Supplementary Table 1: Study design for rat telemetry study with AZ1 and regorafenib.**

| Compound                                    | AZ1                                                                                                    | Regorafenib                                                                                                           |
|---------------------------------------------|--------------------------------------------------------------------------------------------------------|-----------------------------------------------------------------------------------------------------------------------|
| n size                                      | 6                                                                                                      | 6                                                                                                                     |
| Test occasion 1:<br>Day, test item and dose | Day 0: control (vehicle)<br>Day 1: AZ1 (450 mg/kg)                                                     | Day 0: control (vehicle)<br>Day 1: Regorafenib 8 mg/kg<br>Day 2: Regorafenib 8 mg/kg<br>Day 3: Regorafenib 8 mg/kg    |
| Test occasion 2:<br>Day, test item and dose | Day 0: control (vehicle)<br>Day 1: AZ1 (10 mg/kg)                                                      | Day 0: control (vehicle)<br>Day 1: Regorafenib 16 mg/kg<br>Day 2: Regorafenib 16 mg/kg<br>Day 3: Regorafenib 16 mg/kg |
| Test occasion 3:<br>Day, test item and dose | Day 0: control (vehicle)<br>Day 1: AZ1 (100 mg/kg)<br>Day 2: AZ1 (100 mg/kg)<br>Day 3: AZ1 (100 mg/kg) | -                                                                                                                     |
| Dose volume                                 | 10 ml/kg                                                                                               | 5 mL/kg                                                                                                               |

### Plasma concentrations in rat telemetry study

Supplementary table 2 shows the observed mean concentrations at 2 hour post dose of AZ1 and regorafenib. Concentrations were below the limit of quantification on vehicle dosed days.

**Supplementary Table 2: Concentrations obtained at 2 hours post dose in the rat telemetry study.**

| Compound    | Dose level (mg/kg) | Test occasion | Day | Mean concentration 2 hours post dose (SD) ( $\mu$ M) |
|-------------|--------------------|---------------|-----|------------------------------------------------------|
| AZ1         | 450                | 1             | 1   | 112 (9.32)                                           |
|             | 10                 | 2             | 1   | 8.7 (0.949)                                          |
|             | 100                | 3             | 1   | 54.0 (6.79)                                          |
|             | 100                | 3             | 2   | 56.7 (10.9)                                          |
|             | 100                | 3             | 3   | 64.6 (5.15)                                          |
| Regorafenib | 8                  | 1             | 1   | 0.246 (0.118)                                        |

|    |   |   |               |
|----|---|---|---------------|
| 8  | 1 | 2 | 0.413 (0.184) |
| 8  | 1 | 3 | 0.461 (0.237) |
| 16 | 2 | 1 | 0.347 (0.168) |
| 16 | 2 | 2 | 0.555 (0.272) |
| 16 | 2 | 3 | 0.663 (0.271) |

Literature reports of clinical BP exposure-response at steady state

The literature PKPD reports used in the analysis for BP elevation are shown in supplementary table

3.

**Supplementary Table 3 Overview of Clinical PKPD models of BP changes with VEGFR-2 inhibitors used in analysis.**

| <b>Compound</b>           | <b>Axitinib</b>                                         | <b>Sunitinib</b>                                                                 | <b>Sunitinib</b>                                                                                   | <b>Sunitinib</b>                                                                                                                                  |
|---------------------------|---------------------------------------------------------|----------------------------------------------------------------------------------|----------------------------------------------------------------------------------------------------|---------------------------------------------------------------------------------------------------------------------------------------------------|
| <b>Report</b>             | (Chen <i>et al.</i> , 2015)                             | (Houk <i>et al.</i> , 2010)                                                      | (Khosravan <i>et al.</i> , 2016)                                                                   | (Lindauer <i>et al.</i> , 2010)                                                                                                                   |
| <b>Dose schedule</b>      | 2-10 mg BD for 15 days                                  | 25-150 mg QD or QOD                                                              | 25-75mg QD: continuous, 4weeks on 2 off, or 2 weeks on 1 off                                       | 50 mg QD for 4 weeks                                                                                                                              |
| <b>Patient population</b> | Metastatic renal cell carcinoma (RCC)                   | Advanced solid tumours, including gastrointestinal stromal tumour (GIST) and RCC | GIST and RCC                                                                                       | Healthy subjects                                                                                                                                  |
| <b>DBP/SBP simulated</b>  | DBP                                                     | DBP                                                                              | DBP                                                                                                | DBP                                                                                                                                               |
| <b>PK model</b>           | Linear 2 compartment with first order absorption        | Not reported                                                                     | 2 compartment with first order absorption and elimination for sunitinib and its metabolite SU12662 | 2 compartment model for sunitinib with pre-systemic and systemic metabolism to metabolite SU12662 and transit compartment for delayed absorption. |
| <b>PD model</b>           | Type 3 indirect response model (IDR) with Emax function | Emax function                                                                    | Type 2 IDR with linear drug function                                                               | Proportional function with immediate and slow (transducing) functions                                                                             |

Results of PKPD modelling analysis in rat

The parameter estimates derived from the PKPD analysis of the in house telemetry studies (AZ1 and regorafenib) are shown in supplementary tables 4 and 5 respectively. The PKPD model fits versus observations for AZ1 and regorafenib are shown in supplementary figures 1 and 2. Supplementary table 6 shows the parameter estimates obtained using the literature mean BP data for sunitinib in the rat, and the model fit versus observations is shown in supplementary figure 3.

**Supplementary Table 4: Final parameter estimates for PKPD model estimated from rat telemetry study with AZ1 (PK was fixed). A handling effect was included as described in Equation 1**

| Parameter                       | Estimate (dose in mg/kg)                  | %RSE | %BSV (%RSE) | %IOV (%RSE) |
|---------------------------------|-------------------------------------------|------|-------------|-------------|
| $k_a$ ( $h^{-1}$ )              | 0.26 (10)<br>0.1357 (100)<br>0.0226 (450) | -    | -           | -           |
| V (L/kg)                        | 0.701 (10)<br>0.247 (100)<br>0.0477 (450) | -    | -           | -           |
| $k_e$ ( $h^{-1}$ )              | 0.66 (10)<br>1.87 (100)<br>5.49 (450)     | -    | -           | -           |
| $P_{BP}$                        | 15.1                                      | 8.0  | 22.4 (27)   | -           |
| $k_{HD}$ ( $h^{-1}$ )           | 0.028                                     | 14.2 | -           | -           |
| slope ( $\mu M$ ) <sup>-1</sup> | 0.45                                      | 8.7  | -           | -           |
| $E_0$ (mm Hg)                   | 137.0                                     | 1.2  | -           | 3.1 (28)    |
| $k_{e0}$ ( $h^{-1}$ )           | 0.013                                     | 14.1 | 66 (12)     | -           |

**Supplementary Table 5: Final parameter estimates for PKPD model estimated from rat telemetry study with regorafenib (PK was fixed). No handling effect was required.**

| Parameter          | Estimate | %RSE | %BSV (%RSE) | %IOV (%RSE) |
|--------------------|----------|------|-------------|-------------|
| $k_a$ ( $h^{-1}$ ) | 0.071    | -    | -           | -           |
| V (L/kg)           | 7.24     | -    | -           | -           |
| $k_e$ ( $h^{-1}$ ) | 0.213    | -    | -           | -           |

|                                                      |       |      |              |                |
|------------------------------------------------------|-------|------|--------------|----------------|
| <b>slope (<math>\mu\text{M}</math>)<sup>-1</sup></b> | 12.1  | 15.7 | 41.3         | -              |
| <b>E<sub>0</sub> (mm Hg)</b>                         | 130.5 | 4.0  | 32.9<br>(58) | 216.6<br>(158) |
| <b>k<sub>e0</sub> (h<sup>-1</sup>)</b>               | 0.047 | 14.5 | 3.0<br>(37)  | -              |

**Supplementary Table 6: Sunitinib Rat telemetry parameter estimates (PK was fixed during PD estimation) using PK model estimated from data in Speed *et al* and average rat BP from Engle *et al*. No mixed effects (i.e. IIV or IOV) or handling effect was included in the final model fit.**

| <b>Parameter</b>                                     | <b>Estimate</b> | <b>%CV</b> |
|------------------------------------------------------|-----------------|------------|
| <b>k<sub>a</sub> (h<sup>-1</sup>)</b>                | 0.115           | -          |
| <b>V (L/kg)</b>                                      | 14.8            | -          |
| <b>CL (L/h/kg)</b>                                   | 1.72            | -          |
| <b>slope (<math>\mu\text{M}</math>)<sup>-1</sup></b> | 22.62           | 36.7       |
| <b>E<sub>BL</sub> (mm Hg)</b>                        | 99.43           | 1.4        |
| <b>k<sub>e0</sub> (h<sup>-1</sup>)</b>               | 0.0057          | 51         |
| <b>Amp</b>                                           | 2.80            | 17.3       |
| <b>Tshift</b>                                        | 17.45           | 10.1       |
| <b>Freq</b>                                          | 22.7            | 1.7        |

*PKPD model parameters used in simulations for human PKPD reports*

Supplementary table 7 contains the parameter estimates and equations used in the simulation of PK metric versus BP elevation. The time course of effects could not be replicated for Lindauer *et al*. since the data was converted to a ratio of BP increase rather than raw BP effect, where the model was driven by concentrations of sunitinib and its active metabolite SU12662, which are at similar concentrations following dosing with the parent drug. In the model these are assumed to be equipotent so rather than simulate the time course which included an immediate and slow transducing effect, the underlying steady state relationship accounting for both effects was used.

This dual drug effect function at steady state which predicted ~11 mm Hg change at 100 ng/mL which was in line with the observed level of effect. The resulting PK metrics were converted into  $\mu\text{M}$  units for comparison to VEGFR-2 potency.

**Supplementary Table 7: Overview of approach to simulate exposure-response relationship for clinical PKPD reports.**

| Compound                      | Axitinib                                                                                                                                                  | Sunitinib                                                                               | Sunitinib                                                                                                                           | Sunitinib                                                                                                                            |
|-------------------------------|-----------------------------------------------------------------------------------------------------------------------------------------------------------|-----------------------------------------------------------------------------------------|-------------------------------------------------------------------------------------------------------------------------------------|--------------------------------------------------------------------------------------------------------------------------------------|
| <b>Report</b>                 | (Chen, <i>et al.</i> , 2015)                                                                                                                              | (Houk <i>et al.</i> , 2010)                                                             | (Khosravan <i>et al.</i> , 2016)                                                                                                    | (Lindauer <i>et al.</i> , 2010)                                                                                                      |
| <b>Dose range simulated</b>   | 0.2 to 20 mg                                                                                                                                              | $C_{\text{trough}}$ 0.0001 to 0.1 $\mu\text{g/mL}$                                      | 1-75mg                                                                                                                              | Total Concentrations up to 100 ng/mL                                                                                                 |
| <b>PK parameter estimates</b> | $k_a=0.482 \text{ h}^{-1}$<br>$V_c/F=47.3 \text{ L}$<br>$V_p/F=393 \text{ L}$<br>$Cl/F=14.6 \text{ L/h}$<br>$Q/F=4 \text{ L/h}$<br>$Tlag=0.454 \text{ h}$ | -                                                                                       | $k_a=0.126 \text{ h}^{-1}$<br>$V_c/F=2700 \text{ L}$<br>$V_p/F=774 \text{ L}$<br>$Cl/F=34.1 \text{ L/h}$<br>$Q/F=0.688 \text{ L/h}$ | -                                                                                                                                    |
| <b>PD model equations</b>     | $dDBP/dt=k_{in} \cdot (1+E_{max} \cdot C)/(EC_{50} \cdot C) - k_{out} \cdot BP$<br><br>BP change= $DBP(t)-E_0$                                            | $DBP(t)=E_0+E_{max} \cdot C_{trough}/C_{trough}+EC_{50}$<br><br>BP change= $DBP(t)-E_0$ | $dDBP/dt=k_{in} \cdot (k_{PD} \cdot C) - k_{out} \cdot BP$<br><br>$k_{in}=k_{out} \cdot E_0$<br><br>BP change= $DBP(t)-E_0$         | $DBP(t)=E_0 \cdot (1+\alpha_{dia} \cdot (2 \cdot INH))$<br><br>$INH=C \cdot f_u / (kd + C \cdot f_u)$<br><br>BP change= $DBP(t)-E_0$ |
| <b>PD Parameter estimates</b> | $E_0=72.4 \text{ mm Hg}$<br>$k_{out}=0.254 \text{ h}^{-1}$<br>$E_{max}=0.208$<br>$EC_{50}=12.4 \text{ ng/mL}$                                             | $E_0=74 \text{ mm Hg}$<br>$E_{max}=17$<br>$EC_{50}=0.084 \mu\text{g/mL}$                | $k_{PD}=0.00184 \text{ (mg/L)}^{-1}$<br>$E_0=74.6 \text{ mm Hg}$<br>$k_{out}=0.0288 \text{ h}^{-1}$                                 | $E_0=67.6 \text{ mmHg}$<br>$k_d=4 \text{ ng/mL}$<br>$\alpha_{dia}=0.145$<br>$f_u=0.05$                                               |

### VEGFR-2 potency

The  $IC_{50}$  values obtained in the different assays together with relevant species'  $f_u$  are summarised in supplementary table 8 and table 9.

**Supplementary Table 8 VEGFR-2  $IC_{50}$  values from HUVEC, PAE and SPR assays, and rat and human  $f_u$  where relevant. \*was obtained from Wilhelm *et al.*, 2011.**

| Compound | HUVEC, $IC_{50}$ ( $\mu\text{M}$ ) | PAE, $IC_{50}$ ( $\mu\text{M}$ ) | SPR, $IC_{50}$ ( $\mu\text{M}$ ) | rat PPB $f_u$ |
|----------|------------------------------------|----------------------------------|----------------------------------|---------------|
| AZ1      | 0.341                              | 0.836                            | 0.439                            | 0.065         |

rat PPB  $f_u$  = fraction unbound based on rat plasma protein binding

Reported incidence of clinical hypertension

The patient population and references for each reported incidence of clinical hypertension used in the analysis is detailed in supplementary table 9. The PK metrics were converted into  $\mu\text{M}$  units for comparison to VEGFR-2 potency.

Supplementary Table 9: References for studies used to determine the incidence of hypertension for tyrosine kinase inhibitors

| Drug       | MW   | Dose (mg/day) | Free Cmax (μM) | Free AUC (μM.hr) | Free Cav (μM) | HT Grade 1-4 (%) | HT Grade 3-4 (%) | PPB $f_u$ | HUVEC IC <sub>50</sub> (μM) | SPR IC <sub>50</sub> (μM) | PAE IC <sub>50</sub> (μM) | Cmax/HUVEC (μM) | Cmax/SPR (μM) | Cmax/PAE (μM) | AUC/HUVEC (μM) | AUC/SPR (μM) | AUC/PAE (μM) | Cav/HUVEC (μM) | Cav/SPR (μM) | Cav/PAE (μM) | References             |      |
|------------|------|---------------|----------------|------------------|---------------|------------------|------------------|-----------|-----------------------------|---------------------------|---------------------------|-----------------|---------------|---------------|----------------|--------------|--------------|----------------|--------------|--------------|------------------------|------|
| Axitinib   | 386  | 4             | 0.000673       | 0.005            | 0.0004        | 0                |                  |           |                             |                           |                           | 12.7            | 8.9           | 1.1           | 89.7           | 62.6         | 7.8          | 7.5            | 5.2          | 0.6          | (Rugo et al., 2005)    |      |
|            |      | 10            | 0.000699       | 0.007            | 0.0006        | 0                |                  |           |                             |                           |                           | 13.2            | 9.2           | 1.1           | 126.4          | 88.3         | 10.9         | 10.5           | 7.4          | 0.9          | (Locati et al., 2014)  |      |
|            |      | 10            | 0.00163        | 0.012            | 0.0010        | 0                |                  |           |                             |                           |                           | 30.9            | 21.6          | 2.7           | 221.0          | 154.4        | 19.1         | 18.4           | 12.9         | 1.6          |                        |      |
|            |      | 15            | 0.002122       | 0.019            | 0.0008        | 17               |                  | 0.01      | 5.28E-05                    | 0.00008                   | 0.0006                    | 40.2            | 28.1          | 3.5           | 351.4          | 245.4        | 30.4         | 14.6           | 10.2         | 1.3          |                        |      |
|            |      | 40            | 0.004192       | 0.056            | 0.0047        | 50               |                  |           |                             |                           |                           | 79.4            | 55.4          | 6.9           | 1063.9         | 743.1        | 92.0         | 88.7           | 61.9         | 7.7          |                        |      |
|            |      | 10            |                | 0.008            | 0.0007        | 54               |                  |           |                             |                           |                           |                 |               |               | 154.9          | 108.2        | 13.4         | 12.9           | 9.0          | 1.1          |                        |      |
| Brivanib   | 370  | 800           | 0.23           | 2.2              | 0.1           | 41               | 13               | 0.013     | 0.0118                      | 0.0308                    | 0.0375                    | 19.6            | 7.5           | 6.2           | 186.2          | 71.6         | 58.8         | 7.8            | 3.0          | 2.4          | (Jonker et al., 2011)  |      |
| Crenolanib | 444  | 100           | 0.06           | 0.42             | 0.02          | 0                | 0                |           |                             |                           |                           | 0.05            | 0.03          | 0.01          | 0.33           | 0.21         | 0.08         | 0.02           | 0.01         | 0.00         | (Lewis et al., 2009)   |      |
|            |      | 200           | 0.14           | 0.93             | 0.04          | 0                | 0                |           |                             |                           |                           |                 | 0.11          | 0.07          | 0.03           | 0.74         | 0.46         | 0.19           | 0.03         | 0.02         |                        | 0.01 |
|            |      | 280           | 0.22           | 2.06             | 0.10          | 0                | 0                | 0.0796    | 1.258                       | >2                        | >5                        | 0.17            | 0.11          | 0.04          | 1.64           | 1.03         | 0.41         | 0.08           | 0.05         | 0.02         |                        |      |
|            |      | 340           | 0.31           | 2.75             | 0.13          | 0                | 0                |           |                             |                           |                           | 0.25            | 0.16          | 0.06          | 2.18           | 1.37         | 0.55         | 0.10           | 0.06         | 0.03         |                        |      |
|            |      | 120           | 0.09           | 0.58             | 0.05          | 0                | 0                |           |                             |                           |                           | 0.07            | 0.05          | 0.02          | 0.46           | 0.29         | 0.12         | 0.04           | 0.03         | 0.01         |                        |      |
| Dasatinib  | 488  | 50            | 0.00           | 0.019            | 0.001         | 0                | 0                |           |                             |                           |                           | 0.0062          | 0.001         | 0.0005        | 0.02485        | 0.004        | 0.002        | 0.0010         | 0.0002       | 0.0001       | (Aplenc et al., 2011)  |      |
|            |      | 65            | 0.01           | 0.031            | 0.001         | 0                | 0                |           |                             |                           |                           | 0.0168          | 0.003         | 0.0013        | 0.03987        | 0.006        | 0.003        | 0.0017         | 0.0003       | 0.0001       |                        |      |
|            |      | 85            | 0.01           | 0.042            | 0.002         | 0                | 0                |           |                             |                           |                           | 0.0155          | 0.002         | 0.0012        | 0.05467        | 0.008        | 0.004        | 0.0023         | 0.0004       | 0.0002       |                        |      |
|            |      | 110           | 0.02           | 0.057            | 0.002         | 0                | 0                |           |                             |                           |                           | 0.0234          | 0.004         | 0.0018        | 0.07331        | 0.011        | 0.006        | 0.0031         | 0.0005       | 0.0002       | (Demetri et al., 2009) |      |
|            |      | 35            | 0.00           | 0.007            | 0.000         | 0                | 0                |           |                             |                           |                           | 0.0021          | 0.000         | 0.0002        | 0.00949        | 0.001        | 0.001        | 0.0004         | 0.0001       | 0.0000       |                        |      |
|            |      | 50            | 0.00           | 0.014            | 0.001         | 0                | 0                |           |                             |                           |                           | 0.0049          | 0.001         | 0.0004        | 0.01785        | 0.003        | 0.001        | 0.0007         | 0.0001       | 0.0001       |                        |      |
|            |      | 70            | 0.00           | 0.014            | 0.001         | 0                | 0                | 0.0425    | >0.771                      | >5                        | >10                       | 0.0028          | 0.000         | 0.0002        | 0.01819        | 0.003        | 0.001        | 0.0008         | 0.0001       | 0.0001       |                        |      |
|            |      | 70            | 0.00           | 0.028            | 0.002         | 0                | 0                |           |                             |                           |                           | 0.0056          | 0.001         | 0.0004        | 0.03671        | 0.006        | 0.003        | 0.0031         | 0.0005       | 0.0002       |                        |      |
|            |      | 90            | 0.01           | 0.043            | 0.002         | 0                | 0                |           |                             |                           |                           | 0.0094          | 0.001         | 0.0007        | 0.05557        | 0.009        | 0.004        | 0.0023         | 0.0004       | 0.0002       |                        |      |
|            |      | 90            | 0.01           | 0.024            | 0.002         | 0                | 0                |           |                             |                           |                           | 0.0081          | 0.001         | 0.0006        | 0.03095        | 0.005        | 0.002        | 0.0026         | 0.0004       | 0.0002       |                        |      |
|            |      | 100           | 0.00           | 0.018            | 0.002         | 0                | 0                |           |                             |                           |                           | 0.0059          | 0.001         | 0.0005        | 0.02338        | 0.004        | 0.002        | 0.0019         | 0.0003       | 0.0002       |                        |      |
| 120        | 0.01 | 0.034         | 0.001          | 0                | 0             |                  |                  |           |                             | 0.0111                    | 0.002                     | 0.0009          | 0.04473       | 0.007         | 0.003          | 0.0019       | 0.0003       | 0.0001         |              |              |                        |      |

| Drug      | MW  | Dose (mg/day) | Free Cmax ( $\mu\text{M}$ ) | Free AUC ( $\mu\text{M}\cdot\text{hr}$ ) | Free Cav ( $\mu\text{M}$ ) | HT Grade 1-4 (%) | HT Grade 3-4 (%) | PPB $f_u$ | HUVEC IC <sub>50</sub> ( $\mu\text{M}$ ) | SPR IC <sub>50</sub> ( $\mu\text{M}$ ) | PAE IC <sub>50</sub> ( $\mu\text{M}$ ) | Cmax/HUVEC ( $\mu\text{M}$ ) | Cmax/SPR ( $\mu\text{M}$ ) | Cmax/PAE ( $\mu\text{M}$ ) | AUC/HUVEC ( $\mu\text{M}$ ) | AUC/SPR ( $\mu\text{M}$ ) | AUC/PAE ( $\mu\text{M}$ ) | Cav/HUVEC ( $\mu\text{M}$ ) | Cav/SPR ( $\mu\text{M}$ ) | Cav/PAE ( $\mu\text{M}$ ) | References              |
|-----------|-----|---------------|-----------------------------|------------------------------------------|----------------------------|------------------|------------------|-----------|------------------------------------------|----------------------------------------|----------------------------------------|------------------------------|----------------------------|----------------------------|-----------------------------|---------------------------|---------------------------|-----------------------------|---------------------------|---------------------------|-------------------------|
|           |     | 120           | 0.01                        | 0.018                                    | 0.002                      | 0                | 0                |           |                                          |                                        |                                        | 0.0068                       | 0.001                      | 0.0005                     | 0.02338                     | 0.004                     | 0.002                     | 0.0019                      | 0.0003                    | 0.0002                    |                         |
|           |     | 160           | 0.02                        | 0.044                                    | 0.002                      | 0                | 0                |           |                                          |                                        |                                        | 0.0201                       | 0.003                      | 0.0016                     | 0.05670                     | 0.009                     | 0.004                     | 0.0024                      | 0.0004                    | 0.0002                    |                         |
|           |     | 25            | 0.001                       | 0.01                                     | 0.000                      | 0                | 0                |           |                                          |                                        |                                        | 0.032                        | 0.001                      | 0.025                      | 0.3                         | 0.012                     | 0.2                       | 0.01                        | 0.0005                    | 0.01                      | (Sarker et al., 2008)   |
|           |     | 50            | 0.002                       | 0.04                                     | 0.002                      | 0                | 0                |           |                                          |                                        |                                        | 0.097                        | 0.004                      | 0.075                      | 1.6                         | 0.073                     | 1.2                       | 0.07                        | 0.003                     | 0.05                      |                         |
|           |     | 75            | 0.004                       | 0.06                                     | 0.002                      | 0                | 0                |           |                                          |                                        |                                        | 0.162                        | 0.007                      | 0.125                      | 2.6                         | 0.116                     | 2.0                       | 0.11                        | 0.0048                    | 0.08                      | (Angevin et al., 2013)  |
|           |     | 100           | 0.004                       | 0.07                                     | 0.003                      | 0                | 0                |           |                                          |                                        |                                        | 0.194                        | 0.009                      | 0.149                      | 3.2                         | 0.145                     | 2.5                       | 0.13                        | 0.0061                    | 0.10                      |                         |
| Dovitinib | 392 | 100           | 0.004                       | 0.07                                     | 0.003                      | 6                | 0                | 0.0285    | 0.022467                                 | >0.5                                   | 0.0292                                 | 0.194                        | 0.009                      | 0.149                      | 3.2                         | 0.145                     | 2.5                       | 0.13                        | 0.0061                    | 0.10                      |                         |
|           |     | 125           | 0.007                       | 0.09                                     | 0.004                      | 0                | 0                |           |                                          |                                        |                                        | 0.291                        | 0.013                      | 0.224                      | 4.0                         | 0.182                     | 3.1                       | 0.17                        | 0.0076                    | 0.13                      |                         |
|           |     | 175           | 0.007                       | 0.11                                     | 0.005                      | 0                | 0                |           |                                          |                                        |                                        | 0.323                        | 0.015                      | 0.249                      | 4.8                         | 0.218                     | 3.7                       | 0.20                        | 0.0091                    | 0.16                      |                         |
|           |     | 500           | 0.022                       | 0.32                                     | 0.013                      | 27               | 0                |           |                                          |                                        |                                        | 0.981                        | 0.044                      | 0.756                      | 14.3                        | 0.641                     | 11.0                      | 0.59                        | 0.027                     | 0.46                      |                         |
|           |     | 600           | 0.023                       | 0.32                                     | 0.013                      | 20               | 20               |           |                                          |                                        |                                        | 1.013                        | 0.046                      | 0.781                      | 14.4                        | 0.646                     | 11.1                      | 0.60                        | 0.0269                    | 0.46                      |                         |
| Erlotinib | 393 | 100           | 0.14                        | 0.082                                    | 0.0034                     | 0                | 0                | 0.059     | >0.5                                     | >2                                     | >10                                    | 0.28                         | 0.071                      | 0.014                      | 0.16466                     | 0.041                     | 0.008                     | 0.0069                      | 0.0017                    | 0.00034                   | (Herbst et al., 2005)   |
|           |     | 150           | 0.17                        | 0.103                                    | 0.0043                     | 0                | 0                |           |                                          |                                        |                                        | 0.34                         | 0.085                      | 0.017                      | 0.20635                     | 0.052                     | 0.010                     | 0.0086                      | 0.0021                    | 0.00043                   |                         |
| Foretinib | 633 | 252           | 0.00034                     | 0.006                                    | 0.0003                     | 36               | 0                |           |                                          |                                        |                                        | 0.074                        | 0.008                      | 0.011                      | 1.4                         | 0.14                      | 0.21                      | 0.06                        | 0.0059                    | 0.0086                    | (Eder et al., 2010)     |
|           |     | 80            | 0.00007                     | 0.001                                    | 0.00005                    | 75               | 17               | 0.001     | 0.00457                                  | 0.0449                                 | 0.03                                   | 0.016                        | 0.002                      | 0.002                      | 0.3                         | 0.028                     | 0.041                     | 0.01                        | 0.0012                    | 0.0017                    | (Shapiro et al., 2013)  |
|           |     | 400           | 0.31                        | 5.0                                      | 0.4                        | 0                | 0                |           |                                          |                                        |                                        | 0.0062                       | 0.062                      | 0.031                      | 0.100                       | 1.001                     | 0.500                     | 0.008                       | 0.083                     | 0.042                     | (Reardon et al., 2008)  |
|           |     | 600           | 0.36                        | 5.7                                      | 0.5                        | 0                | 0                |           |                                          |                                        |                                        | 0.0072                       | 0.071                      | 0.036                      | 0.115                       | 1.149                     | 0.574                     | 0.010                       | 0.096                     | 0.048                     |                         |
| Imatinib  | 494 | 800           | 0.33                        | 4.1                                      | 0.3                        | 0                | 0                | 0.05      | 49.86                                    | >5                                     | >10                                    | 0.0065                       | 0.065                      | 0.033                      | 0.082                       | 0.820                     | 0.410                     | 0.007                       | 0.068                     | 0.034                     |                         |
|           |     | 1000          | 0.31                        | 4.3                                      | 0.4                        | 0                | 0                |           |                                          |                                        |                                        | 0.0062                       | 0.062                      | 0.031                      | 0.086                       | 0.857                     | 0.428                     | 0.007                       | 0.071                     | 0.036                     |                         |
|           |     | 1200          | 0.22                        | 3.5                                      | 0.3                        | 0                | 0                |           |                                          |                                        |                                        | 0.0043                       | 0.043                      | 0.022                      | 0.071                       | 0.705                     | 0.353                     | 0.006                       | 0.059                     | 0.029                     |                         |
|           |     | 750           | 0.0008                      | 0.006                                    | 0.0003                     | 0                | 0                |           |                                          |                                        |                                        | 0.00050                      | 0.0004                     | 0.000075                   | 0.00427                     | 0.003                     | 0.0006                    | 0.00018                     | 0.0001                    | 0.00003                   | (Thiessen et al., 2010) |
|           |     | 1000          | 0.0001                      | 0.001                                    | 0.0000                     | 0                | 0                |           |                                          |                                        |                                        | 0.00009                      | 0.0001                     | 0.000014                   | 0.00057                     | 0.000                     | 0.0001                    | 0.00002                     | 0.0000                    | 0.00000                   |                         |
| Lapatinib | 581 | 1500          | 0.0004                      | 0.004                                    | 0.0002                     | 0                | 0                | 0.0001    | 1.49                                     | >2                                     | >10                                    | 0.00030                      | 0.0002                     | 0.000045                   | 0.00293                     | 0.002                     | 0.0004                    | 0.00012                     | 0.0001                    | 0.00002                   | (Nakagawa et al., 2009) |
|           |     | 900           | 0.0003                      | 0.005                                    | 0.0002                     | 0                | 0                |           |                                          |                                        |                                        | 0.00022                      | 0.0002                     | 0.000033                   | 0.00338                     | 0.003                     | 0.0005                    | 0.00014                     | 0.0001                    | 0.00002                   |                         |
|           |     | 1200          | 0.0003                      | 0.004                                    | 0.0002                     | 0                | 0                |           |                                          |                                        |                                        | 0.00020                      | 0.0001                     | 0.000030                   | 0.00297                     | 0.002                     | 0.0004                    | 0.00012                     | 0.0001                    | 0.00002                   |                         |



| Drug      | MW  | Dose (mg/day) | Free Cmax ( $\mu\text{M}$ ) | Free AUC ( $\mu\text{M}\cdot\text{hr}$ ) | Free Cav ( $\mu\text{M}$ ) | HT Grade 1-4 (%) | HT Grade 3-4 (%) | PPB $f_u$ | HUVEC IC <sub>50</sub> ( $\mu\text{M}$ ) | SPR IC <sub>50</sub> ( $\mu\text{M}$ ) | PAE IC <sub>50</sub> ( $\mu\text{M}$ ) | Cmax/HUVEC ( $\mu\text{M}$ ) | Cmax/SPR ( $\mu\text{M}$ ) | Cmax/PAE ( $\mu\text{M}$ ) | AUC/HUVEC ( $\mu\text{M}$ ) | AUC/SPR ( $\mu\text{M}$ ) | AUC/PAE ( $\mu\text{M}$ ) | Cav/HUVEC ( $\mu\text{M}$ ) | Cav/SPR ( $\mu\text{M}$ ) | Cav/PAE ( $\mu\text{M}$ ) | References                  |
|-----------|-----|---------------|-----------------------------|------------------------------------------|----------------------------|------------------|------------------|-----------|------------------------------------------|----------------------------------------|----------------------------------------|------------------------------|----------------------------|----------------------------|-----------------------------|---------------------------|---------------------------|-----------------------------|---------------------------|---------------------------|-----------------------------|
|           |     | 1600          | 0.0005                      | 0.009                                    | 0.0004                     | 0                | 0                |           |                                          |                                        |                                        | 0.00036                      | 0.0003                     | 0.000054                   | 0.00590                     | 0.004                     | 0.0009                    | 0.00025                     | 0.0002                    | 0.00004                   |                             |
|           |     | 1800          | 0.0004                      | 0.007                                    | 0.0003                     | 0                | 0                |           |                                          |                                        |                                        | 0.00027                      | 0.0002                     | 0.000040                   | 0.00456                     | 0.003                     | 0.0007                    | 0.00019                     | 0.0001                    | 0.00003                   |                             |
| Linifanib | 375 | 7             | 0.002                       | 0.058                                    | 0.0024                     | 33               | 0                |           |                                          |                                        |                                        | 6.3                          | 0.12                       | 2.4                        | 161.5                       | 3.2                       | 61.7                      | 6.7                         | 0.13                      | 2.57                      | (Wong et al., 2009)         |
|           |     | 700           | 0.004                       | 0.076                                    | 0.0032                     | 66               | 0                |           |                                          |                                        |                                        | 10.9                         | 0.21                       | 4.2                        | 213.6                       | 4.2                       | 81.6                      | 8.9                         | 0.17                      | 3.40                      |                             |
|           |     | 18            | 0.005                       | 0.108                                    | 0.0045                     | 58               | 0                | 0.007     | 0.000358                                 | 0.02                                   | 0.000937                               | 13.0                         | 0.25                       | 5.0                        | 302.1                       | 5.9                       | 115.4                     | 12.6                        | 0.25                      | 4.81                      |                             |
|           |     | 21            | 0.006                       | 0.147                                    | 0.0061                     | 100              | 0                |           |                                          |                                        |                                        | 17.7                         | 0.35                       | 6.8                        | 411.5                       | 8.0                       | 157.2                     | 17.1                        | 0.34                      | 6.55                      |                             |
|           |     | 125           | 0.13                        | 0.39                                     | 0.02                       | 47               | 23               |           |                                          |                                        |                                        | 46.8                         | 8.1                        | 18.9                       | 140.9                       | 24.4                      | 56.9                      | 5.9                         | 1.0                       | 2.4                       | (Benjamin et al., 2011)     |
|           |     | 125           | 0.09                        | 0.33                                     | 0.01                       | 27               | 10               |           |                                          |                                        |                                        | 32.8                         | 5.7                        | 13.2                       | 120.3                       | 20.9                      | 48.5                      | 5.0                         | 0.9                       | 2.0                       |                             |
|           |     | 125           | 0.12                        | 0.62                                     | 0.03                       | 56               | 25               |           |                                          |                                        |                                        | 43.8                         | 7.6                        | 17.7                       | 222.2                       | 38.5                      | 89.7                      | 9.3                         | 1.6                       | 3.7                       |                             |
|           |     | 50            | 0.09                        | 0.20                                     | 0.01                       | 0                | 0                |           |                                          |                                        |                                        | 31.2                         | 5.4                        | 12.6                       | 73.0                        | 12.7                      | 29.4                      | 3.0                         | 0.5                       | 1.2                       | (Schlumberger et al., 2009) |
|           |     | 100           | 0.06                        | 0.36                                     | 0.02                       | 100              | 0                |           |                                          |                                        |                                        | 21.7                         | 3.8                        | 8.8                        | 128.1                       | 22.2                      | 51.7                      | 5.5                         | 0.9                       | 2.2                       |                             |
|           |     | 125           | 0.10                        | 0.31                                     | 0.01                       | 67               | 0                |           |                                          |                                        |                                        | 35.6                         | 6.2                        | 14.4                       | 110.8                       | 19.2                      | 44.7                      | 4.6                         | 0.8                       | 1.9                       | (Sherman et al., 2008)      |
| Motesanib | 373 | 50            | 0.03                        | 0.15                                     | 0.01                       | 42               | 20               | 0.0577    | 0.002775                                 | 0.016                                  | 0.0069                                 | 11.9                         | 2.1                        | 4.8                        | 54.1                        | 9.4                       | 21.8                      | 2.3                         | 0.4                       | 0.9                       |                             |
|           |     |               |                             |                                          |                            |                  |                  |           |                                          |                                        |                                        |                              |                            |                            |                             |                           |                           |                             |                           |                           | (Fujisaka et al., 2010)     |
|           |     | 125           | 0.05                        | 0.30                                     | 0.01                       | 63               | 14               |           |                                          |                                        |                                        | 19.7                         | 3.4                        | 8.0                        | 107.5                       | 18.6                      |                           | 4.5                         | 0.8                       | 1.8                       | (Rosen et al., 2007)        |
|           |     |               |                             |                                          |                            |                  |                  |           |                                          |                                        |                                        |                              |                            |                            |                             |                           |                           |                             |                           |                           | (Sawaki et al., 2010)       |
|           |     | 50-200        |                             | 0.2                                      | 0.006                      | 0                | 0                |           |                                          |                                        |                                        |                              |                            |                            | 0.043                       | 0.076                     | 0.015                     | 0.002                       | 0.003                     | 0.001                     | (Kantarjian et al., 2006)   |
|           |     | 400           |                             | 0.2                                      | 0.010                      | 0                | 0                |           |                                          |                                        |                                        |                              |                            |                            | 0.069                       | 0.121                     | 0.024                     | 0.003                       | 0.005                     | 0.001                     |                             |
| Nilotinib | 530 | 600-1200      | 0.068289                    | 0.6                                      | 0.025                      | 0                | 0                | 0.016     | >3.518                                   | >2                                     | >10                                    | 0.019411                     | 0.034144                   | 0.006829                   | 0.172                       | 0.302                     | 0.060                     | 0.007                       | 0.013                     | 0.003                     |                             |
|           |     | 800           |                             | 0.9                                      | 0.038                      | 0                | 0                |           |                                          |                                        |                                        |                              |                            |                            | 0.258                       | 0.453                     | 0.091                     | 0.011                       | 0.019                     | 0.004                     |                             |
|           |     | 1200          |                             | 1.2                                      | 0.050                      | 0                | 0                |           |                                          |                                        |                                        |                              |                            |                            | 0.344                       | 0.604                     | 0.121                     | 0.014                       | 0.025                     | 0.005                     |                             |

| Drug      | MW    | Dose (mg/day) | Free Cmax ( $\mu\text{M}$ ) | Free AUC ( $\mu\text{M}\cdot\text{hr}$ ) | Free Cav ( $\mu\text{M}$ ) | HT Grade 1-4 (%) | HT Grade 3-4 (%) | PPB $f_u$ | HUVEC IC <sub>50</sub> ( $\mu\text{M}$ ) | SPR IC <sub>50</sub> ( $\mu\text{M}$ ) | PAE IC <sub>50</sub> ( $\mu\text{M}$ ) | Cmax/HUVEC ( $\mu\text{M}$ ) | Cmax/SPR ( $\mu\text{M}$ ) | Cmax/PAE ( $\mu\text{M}$ ) | AUC/HUVEC ( $\mu\text{M}$ ) | AUC/SPR ( $\mu\text{M}$ ) | AUC/PAE ( $\mu\text{M}$ ) | Cav/HUVEC ( $\mu\text{M}$ ) | Cav/SPR ( $\mu\text{M}$ ) | Cav/PAE ( $\mu\text{M}$ ) | References             |                        |
|-----------|-------|---------------|-----------------------------|------------------------------------------|----------------------------|------------------|------------------|-----------|------------------------------------------|----------------------------------------|----------------------------------------|------------------------------|----------------------------|----------------------------|-----------------------------|---------------------------|---------------------------|-----------------------------|---------------------------|---------------------------|------------------------|------------------------|
| Pazopanib | 438   | 50            | 0.002                       | 0.036                                    | 0.0015                     | 0                |                  |           |                                          |                                        |                                        | 1.1                          | ND                         | 0.7                        | 19.9                        | -                         | 12                        | 0.8                         | -                         | 0.5                       | (Hurwitz et al., 2009) |                        |
|           |       | 100           | 0.003                       | 0.037                                    | 0.0015                     | 0                |                  |           |                                          |                                        |                                        | 1.4                          | ND                         | 0.9                        | 20.4                        | -                         | 13                        | 0.9                         | -                         | 0.5                       |                        |                        |
|           |       | 200           | 0.005                       | 0.088                                    | 0.0037                     | 0                |                  |           |                                          |                                        |                                        | 3.0                          | ND                         | 1.9                        | 48.9                        | -                         | 30                        | 2.0                         | -                         | 1.3                       |                        | (Shibata et al., 2013) |
|           |       | 600           | 0.008                       |                                          |                            | 0                |                  |           |                                          |                                        |                                        | 4.7                          | ND                         | 2.9                        | 0.0                         | -                         |                           |                             | -                         |                           |                        |                        |
|           |       | 400           | 0.005                       | 0.102                                    | 0.0043                     | 0                |                  |           |                                          |                                        |                                        |                              | 2.8                        | ND                         | 1.7                         | 56.8                      | -                         | 35                          | 2.4                       | -                         | 1.5                    | (Yau et al., 2011)     |
|           |       | 800           | 0.008                       |                                          |                            | 0                |                  |           |                                          |                                        |                                        | 4.6                          | ND                         | 2.8                        | 0.0                         | -                         |                           |                             | -                         |                           |                        |                        |
|           |       | 600           | 0.004                       | 0.076                                    | 0.0032                     | 0                |                  |           |                                          |                                        |                                        |                              | 2.3                        | ND                         | 1.4                         | 42.4                      | -                         | 26                          | 1.8                       | -                         | 1.1                    |                        |
|           |       | 800           | 0.010                       | 0.170                                    | 0.0071                     | 33               |                  |           |                                          |                                        |                                        |                              | 5.7                        | ND                         | 3.5                         | 94.4                      | -                         | 58                          | 3.9                       | -                         | 2.4                    |                        |
|           |       | 1000          | 0.012                       | 0.182                                    | 0.0076                     | 33               |                  |           |                                          |                                        |                                        |                              | 6.8                        | ND                         | 4.2                         | 101.1                     | -                         | 63                          | 4.2                       | -                         | 2.6                    |                        |
|           |       | 1400          | 0.007                       | 0.123                                    | 0.0051                     | 33               |                  |           |                                          |                                        |                                        |                              | 4.2                        | ND                         | 2.6                         | 68.1                      | -                         | 42                          | 2.8                       | -                         | 1.8                    |                        |
|           |       | 2000          | 0.012                       | 0.197                                    | 0.0082                     | 33               |                  |           |                                          |                                        |                                        |                              | 6.7                        | ND                         | 4.1                         | 109.2                     | -                         | 68                          | 4.6                       | -                         | 2.8                    |                        |
|           |       | 50            | 0.002                       | 0.024                                    | 0.0010                     | 33               | 25               |           |                                          |                                        |                                        |                              | 1.0                        | ND                         | 0.6                         | 13.3                      | -                         | 8                           | 0.6                       | -                         | 0.3                    |                        |
|           |       | 100           | 0.002                       | 0.027                                    | 0.0011                     |                  |                  |           |                                          |                                        |                                        |                              | 1.1                        | ND                         | 0.7                         | 15.3                      | -                         | 9                           | 0.6                       | -                         | 0.4                    |                        |
|           |       | 200           | 0.002                       | 0.033                                    | 0.0014                     |                  |                  | 0.0001    | 0.0018                                   | ND                                     | 0.00291                                |                              | 1.3                        | ND                         | 0.8                         | 18.1                      | -                         | 11                          | 0.8                       | -                         | 0.5                    |                        |
|           |       | 600           | 0.001                       | 0.022                                    | 0.0018                     |                  |                  |           |                                          |                                        |                                        |                              | 0.8                        | ND                         | 0.5                         | 12.2                      | -                         | 8                           | 1.0                       | -                         | 0.6                    |                        |
|           |       | 400           | 0.003                       | 0.036                                    | 0.0015                     |                  |                  |           |                                          |                                        |                                        |                              | 1.4                        | ND                         | 0.9                         | 20.0                      | -                         | 12                          | 0.8                       | -                         | 0.5                    |                        |
|           |       | 800           | 0.004                       | 0.063                                    | 0.0052                     |                  |                  |           |                                          |                                        |                                        |                              | 2.5                        | ND                         | 1.5                         | 34.9                      | -                         | 22                          | 2.9                       | -                         | 1.8                    |                        |
|           |       | 600           | 0.008                       | 0.091                                    | 0.0038                     |                  |                  |           |                                          |                                        |                                        |                              | 4.6                        | ND                         | 2.8                         | 50.8                      | -                         | 31                          | 2.1                       | -                         | 1.3                    |                        |
|           |       | 800           | 0.012                       | 0.060                                    | 0.0099                     |                  |                  |           | 4                                        |                                        |                                        |                              | 6.6                        | ND                         | 4.1                         | 33.1                      | -                         | 20                          | 5.5                       | -                         | 3.4                    |                        |
|           |       | 400           | 0.005                       | 0.029                                    | 0.0048                     |                  |                  |           | 11                                       |                                        |                                        |                              | 2.9                        | ND                         | 1.8                         | 15.9                      | -                         | 10                          | 2.6                       | -                         | 1.6                    |                        |
| 800       | 0.008 | 0.040         | 0.0067                      |                                          |                            |                  | 7                |           |                                          |                                        | 4.3                                    | ND                           | 2.6                        | 22.4                       | -                           | 14                        | 3.7                       | -                           | 2.3                       |                           |                        |                        |
| 200       | 0.005 | 0.028         | 0.0047                      |                                          |                            |                  | 15               |           |                                          |                                        | 2.8                                    | ND                           | 1.7                        | 15.5                       | -                           | 10                        | 2.6                       | -                           | 1.6                       |                           |                        |                        |
| 400       | 0.004 | 0.022         | 0.0036                      |                                          |                            |                  | 0                |           |                                          |                                        | 2.2                                    | ND                           | 1.4                        | 11.9                       | -                           | 7                         | 2.0                       | -                           | 1.2                       |                           |                        |                        |
| 100       | 0.001 | 0.003         | 0.0005                      |                                          |                            |                  | 0                |           |                                          |                                        | 0.3                                    | ND                           | 0.2                        | 1.6                        | -                           | 1                         | 0.3                       | -                           | 0.2                       |                           |                        |                        |
| 200       | 0.002 | 0.011         | 0.0019                      |                                          |                            |                  | 0                |           |                                          |                                        | 1.2                                    | ND                           | 0.7                        | 6.2                        | -                           | 4                         | 1.0                       | -                           | 0.6                       |                           |                        |                        |
| 200       | 0.007 | 0.035         | 0.0058                      |                                          |                            | 50               |                  |           |                                          |                                        | 3.8                                    | ND                           | 2.3                        | 19.2                       | -                           | 12                        | 3.2                       | -                           | 2.0                       |                           |                        |                        |
| 400       | 0.007 | 0.038         | 0.0063                      |                                          |                            | 82               |                  |           |                                          |                                        | 4.0                                    | ND                           | 2.5                        | 21.0                       | -                           | 13                        | 3.5                       | -                           | 2.2                       |                           |                        |                        |

| Drug        | MW  | Dose (mg/day) | Free Cmax ( $\mu\text{M}$ ) | Free AUC ( $\mu\text{M}\cdot\text{hr}$ ) | Free Cav ( $\mu\text{M}$ ) | HT Grade 1-4 (%) | HT Grade 3-4 (%) | PPB $f_u$ | HUVEC IC <sub>50</sub> ( $\mu\text{M}$ ) | SPR IC <sub>50</sub> ( $\mu\text{M}$ ) | PAE IC <sub>50</sub> ( $\mu\text{M}$ ) | Cmax/HUVEC ( $\mu\text{M}$ ) | Cmax/SPR ( $\mu\text{M}$ ) | Cmax/PAE ( $\mu\text{M}$ ) | AUC/HUVEC ( $\mu\text{M}$ ) | AUC/SPR ( $\mu\text{M}$ ) | AUC/PAE ( $\mu\text{M}$ ) | Cav/HUVEC ( $\mu\text{M}$ ) | Cav/SPR ( $\mu\text{M}$ ) | Cav/PAE ( $\mu\text{M}$ ) | References               |                                          |
|-------------|-----|---------------|-----------------------------|------------------------------------------|----------------------------|------------------|------------------|-----------|------------------------------------------|----------------------------------------|----------------------------------------|------------------------------|----------------------------|----------------------------|-----------------------------|---------------------------|---------------------------|-----------------------------|---------------------------|---------------------------|--------------------------|------------------------------------------|
|             |     | 600           | 0.007                       | 0.029                                    | 0.0049                     | 50               |                  |           |                                          |                                        |                                        | 3.7                          | ND                         | 2.3                        | 16.4                        | -                         | 10                        | 2.7                         | -                         | 1.7                       |                          |                                          |
|             |     | 800           | 0.009                       | 0.049                                    | 0.0082                     | 40               |                  |           |                                          |                                        |                                        | 5.0                          | ND                         | 3.1                        | 27.2                        | -                         | 17                        | 4.5                         | -                         | 2.8                       |                          |                                          |
| Regorafenib | 483 | 10            | 0.005379                    | 0.06                                     | 0.002                      | 33               |                  |           |                                          |                                        |                                        | 2.1                          | 2.5                        | 0.5                        | 21.9                        | 26.0                      | 4.9                       | 0.9                         | 1.1                       | 0.2                       | (Mross et al., 2012)     |                                          |
|             |     | 30            | 0.015984                    | 0.19                                     | 0.008                      | 20               |                  |           |                                          |                                        |                                        | 6.1                          | 7.3                        | 1.4                        | 72.8                        | 86.4                      | 16.2                      | 3.0                         | 3.6                       | 0.7                       |                          |                                          |
|             |     | 60            | 0.041965                    | 0.49                                     | 0.020                      | 17               | 17               |           |                                          |                                        |                                        |                              | 16.1                       | 19.2                       | 3.6                         | 188.7                     | 224.0                     | 41.9                        | 7.9                       | 9.3                       | 1.7                      | (Eisen et al., 2012)                     |
|             |     | 120           | 0.043883                    | 0.47                                     | 0.019                      | 25               |                  |           | 0.0049                                   | 0.0026                                 | 0.00219                                | 0.0117                       | 16.9                       | 20.0                       | 3.8                         | 179.4                     | 213.0                     | 39.9                        | 7.5                       | 8.9                       | 1.7                      |                                          |
|             |     | 120           | 0.044857                    | 0.52                                     | 0.022                      |                  |                  |           |                                          |                                        |                                        |                              | 17.3                       | 20.5                       | 3.8                         | 198.8                     | 236.0                     | 44.2                        | 8.3                       | 9.8                       | 1.8                      |                                          |
|             |     | 160           | 0.03958                     | 0.59                                     | 0.025                      | 50               | 17               |           |                                          |                                        |                                        |                              | 15.2                       | 18.1                       | 3.4                         | 227.4                     | 270.0                     | 50.5                        | 9.5                       | 11.3                      | 2.1                      |                                          |
|             |     | 220           | 0.045263                    | 0.65                                     | 0.027                      |                  |                  |           |                                          |                                        |                                        |                              | 17.4                       | 20.7                       | 3.9                         | 248.6                     | 295.2                     | 55.3                        | 10.4                      | 12.3                      | 2.3                      |                                          |
|             |     | 160           | 0.045568                    | 0.59                                     | 0.025                      | 49               |                  |           |                                          |                                        |                                        |                              | 17.5                       | 20.8                       | 3.9                         | 227.6                     | 270.2                     | 50.6                        | 9.5                       | 11.3                      | 2.1                      |                                          |
| Saracatinib | 542 | 50            | 0.04                        | 0.6                                      | 0.02                       | 0                | 0                |           |                                          |                                        |                                        | 0.035                        | ND                         | 0.0035                     | 0.5893                      | -                         | 0.29                      | 0.025                       | -                         | 0.002                     | (Hannon et al., 2010)    |                                          |
|             |     | 125           | 0.09                        | 1.4                                      | 0.06                       | 0                | 0                | 0.2       | >1                                       | ND                                     | >10                                    |                              | 0.091                      | ND                         | 0.0091                      | 1.3619                    | -                         | 0.68                        | 0.057                     | -                         | 0.006                    |                                          |
|             |     | 175           | 0.16                        | 2.8                                      | 0.12                       | 0                | 0                |           |                                          |                                        |                                        |                              | 0.164                      | ND                         | 0.0164                      | 2.7999                    | -                         | 1.40                        | 0.117                     | -                         | 0.012                    |                                          |
| Semaxanib   | 238 | 136           | 0.574943                    | 0.457                                    | 0.0191                     | 0                | 0                |           |                                          |                                        |                                        | 11.49886                     | 38.330                     | 5.925715                   | 9.14873                     | 30.496                    | 4.7146                    | 0.38120                     | 1.2707                    | 0.19644                   | (Lockhart et al., 2006)  |                                          |
|             |     | 232           | 0.721826                    | 0.993                                    | 0.0414                     | 16               | 0                | 0.05      | 0.05                                     | 0.015                                  | 0.0970                                 |                              | 14.43653                   | 48.122                     | 7.439584                    | 19.85022                  | 66.167                    | 10.2294                     | 0.82709                   | 2.7570                    | 0.42623                  |                                          |
| Sorafenib   | 465 | 800           | 0.05                        | 0.001                                    | 0.0177                     | 43               | 29               |           |                                          |                                        |                                        | 15.86                        | 3.09                       | 3.41                       | 0.31                        | 0.061                     | 0.067                     | 6.1                         | 1.2                       | 1.3                       | (Fukudo et al., 2014)    |                                          |
|             |     | 200           | 0.04                        | 0.001                                    | 0.0219                     | 0                | 0                |           |                                          |                                        |                                        |                              | 12.88                      | 2.51                       | 2.77                        | 0.19                      | 0.038                     | 0.042                       | 7.5                       | 1.5                       | 1.6                      |                                          |
|             |     | 400           | 0.03                        | 0.000                                    | 0.0171                     | 0                | 0                |           |                                          |                                        |                                        |                              | 9.57                       | 1.86                       | 2.06                        | 0.15                      | 0.029                     | 0.033                       | 5.9                       | 1.1                       | 1.3                      | (Clark, Eder, Ryan, Lathia & Lenz, 2005) |
|             |     | 800           | 0.07                        | 0.001                                    | 0.0507                     | 0                | 0                |           |                                          |                                        |                                        |                              | 22.82                      | 4.45                       | 4.90                        | 0.45                      | 0.087                     | 0.096                       | 17.4                      | 3.4                       | 3.7                      |                                          |
|             |     | 1200          | 0.07                        | 0.001                                    | 0.0581                     | 0                | 0                | 0.005     | 0.002923                                 | 0.015                                  | 0.0136                                 |                              | 24.29                      | 4.73                       | 5.22                        | 0.51                      | 0.100                     | 0.110                       | 19.9                      | 3.9                       | 4.3                      |                                          |
|             |     | 1600          | 0.13                        | 0.002                                    | 0.0832                     | 33               | 33               |           |                                          |                                        |                                        | 45.27                        | 8.82                       | 9.73                       | 0.73                        | 0.143                     |                           | 28.5                        | 5.5                       | 6.1                       | (Strumberg et al., 2007) |                                          |
| Sunitinib   | 398 | 50            | 0.0089                      | 0.16                                     | 0.0066                     | 0                | 0                |           |                                          |                                        |                                        | 0.46                         | 7.34                       | 2.27                       | 8.21                        | 131.71                    | 40.73                     | 0.34                        | 5.49                      | 1.70                      | (Favre et al., 2006)     |                                          |
|             |     | 75            | 0.0509                      | 0.30                                     | 0.0126                     | 9                | 9                | 0.049     | 0.0194                                   | 0.0012                                 | 0.0039                                 |                              | 2.62                       | 42.07                      | 13.01                       | 15.58                     | 249.80                    | 77.26                       | 0.65                      | 10.41                     | 3.22                     |                                          |
|             |     | 100           | 0.0221                      | 0.36                                     | 0.0150                     | 50               | 50               |           |                                          |                                        |                                        |                              | 1.14                       | 18.29                      | 5.66                        | 18.61                     | 298.38                    | 92.28                       | 0.78                      | 12.43                     | 3.85                     |                                          |

| Drug       | MW      | Dose (mg/day) | Free Cmax ( $\mu\text{M}$ ) | Free AUC ( $\mu\text{M}\cdot\text{hr}$ ) | Free Cav ( $\mu\text{M}$ ) | HT Grade 1-4 (%) | HT Grade 3-4 (%) | PPB $f_u$ | HUVEC IC <sub>50</sub> ( $\mu\text{M}$ ) | SPR IC <sub>50</sub> ( $\mu\text{M}$ ) | PAE IC <sub>50</sub> ( $\mu\text{M}$ ) | Cmax/HUVEC ( $\mu\text{M}$ ) | Cmax/SPR ( $\mu\text{M}$ ) | Cmax/PAE ( $\mu\text{M}$ ) | AUC/HUVEC ( $\mu\text{M}$ ) | AUC/SPR ( $\mu\text{M}$ ) | AUC/PAE ( $\mu\text{M}$ ) | Cav/HUVEC ( $\mu\text{M}$ ) | Cav/SPR ( $\mu\text{M}$ ) | Cav/PAE ( $\mu\text{M}$ ) | References              |
|------------|---------|---------------|-----------------------------|------------------------------------------|----------------------------|------------------|------------------|-----------|------------------------------------------|----------------------------------------|----------------------------------------|------------------------------|----------------------------|----------------------------|-----------------------------|---------------------------|---------------------------|-----------------------------|---------------------------|---------------------------|-------------------------|
| Telatinib  | 410     | 20            | 0.011                       | 0.09                                     | 0.007                      | 0                | 0                |           |                                          |                                        |                                        | 1.6                          | ND                         | 0.8                        | 12.8                        | -                         | 6.5                       | 1.1                         | -                         | 0.5                       | (Eskens et al., 2009)   |
|            |         | 75            | 0.015                       | 0.13                                     | 0.011                      | 17               | 0                |           |                                          |                                        |                                        | 2.2                          | ND                         | 1.1                        | 18.4                        | -                         | 9.4                       | 1.5                         | -                         | 0.8                       |                         |
|            |         | 300           | 0.016                       | 0.10                                     | 0.008                      | 33               | 0                |           |                                          |                                        |                                        | 2.2                          | ND                         | 1.1                        | 14.0                        | -                         | 7.2                       | 1.2                         | -                         | 0.6                       |                         |
|            |         | 600           | 0.066                       | 0.41                                     | 0.034                      | 33               | 0                | 0.034     | 0.00702                                  | ND                                     | 0.0137                                 | 9.4                          | ND                         | 4.8                        | 57.8                        | -                         | 29.5                      | 4.8                         | -                         | 2.5                       |                         |
|            |         | 1200          | 0.068                       | 0.42                                     | 0.035                      | 17               | 0                |           |                                          |                                        |                                        | 9.7                          | ND                         | 5.0                        | 59.8                        | -                         | 30.6                      | 5.0                         | -                         | 2.5                       |                         |
|            |         | 900           | 0.094                       | 0.54                                     | 0.045                      | 0                | 0                |           |                                          |                                        |                                        | 13.4                         | ND                         | 6.9                        | 77.1                        | -                         | 39.4                      | 6.4                         | -                         | 3.3                       |                         |
|            |         | 3000          | 0.133                       | 1.01                                     | 0.085                      | 33               | 0                |           |                                          |                                        |                                        | 19.0                         | ND                         | 9.7                        | 144.5                       | -                         | 73.8                      | 12.0                        | -                         | 6.2                       |                         |
| Tivozanib  | 455     | 1             | 0.00012                     | 0.002                                    | 0.0001                     | 33               | 0                |           |                                          |                                        |                                        | 0.7                          | 0.8                        | 0.1                        | 9.5                         | 10.8                      | 1.5                       | 0.4                         | 0.4                       | 0.1                       | (Niwakawa et al., 2013) |
|            |         | 1             | 0.00016                     | 0.011                                    | 0.0001                     | 0                | 0                |           |                                          |                                        |                                        | 0.8                          | 1.0                        | 0.1                        | 60.2                        | 68.6                      | 9.8                       | 0.6                         | 0.6                       | 0.1                       |                         |
|            |         | 1.5           | 0.00053                     | 0.003                                    | 0.0005                     | 50               | 0                |           |                                          |                                        |                                        | 2.8                          | 3.3                        | 0.5                        | 13.6                        | 15.6                      | 2.2                       | 2.5                         | 2.9                       | 0.4                       |                         |
|            |         | 1.5           | 0.00105                     | 0.020                                    | 0.0009                     | 44               | 22               | 0.005     | 0.000185                                 | 0.00016                                | 0.0011                                 | 5.6                          | 6.4                        | 0.9                        | 108.6                       | 125.3                     | 17.9                      | 4.5                         | 5.2                       | 0.7                       |                         |
|            |         | 1             | 0.00055                     | 0.009                                    | 0.0004                     | 39               | 28               |           |                                          |                                        |                                        | 2.9                          | 3.4                        | 0.5                        | 49.8                        | 57.7                      | 8.3                       | 2.1                         | 2.4                       | 0.3                       |                         |
|            |         | 1.5           | 0.00074                     | 0.013                                    | 0.0005                     | 62               | 62               |           |                                          |                                        |                                        | 3.9                          | 4.5                        | 0.7                        | 68.3                        | 79.6                      | 11.4                      | 2.8                         | 3.3                       | 0.5                       |                         |
|            |         | 2             | 0.00121                     | 0.022                                    | 0.0009                     | 100              | 71               |           |                                          |                                        |                                        | 6.3                          | 7.4                        | 1.1                        | 114.9                       | 134.7                     | 19.3                      | 4.8                         | 5.6                       | 0.8                       |                         |
| 1.5        | 0.00104 | 0.018         | 0.0008                      | 45                                       | 0                          |                  |                  |           |                                          | 5.4                                    | 6.4                                    | 0.9                          | 93.9                       | 110.7                      | 15.8                        | 3.9                       | 4.6                       | 0.7                         |                           |                           |                         |
| Vandetanib | 475     | 100           | 0.05                        | 1.7                                      | 0.1                        | 8                | 0                |           |                                          |                                        | ND                                     | -                            | 0.9                        | -                          | -                           | 32.2                      | -                         | -                           | 1.3                       | -                         | (Zhang et al., 2011)    |
|            |         | 100           | 0.08                        | 1.6                                      | 0.1                        | 0                | 0                | 0.07      | ND                                       | 0.05                                   |                                        | -                            | 1.4                        | -                          | -                           | 29.6                      | -                         | -                           | 1.2                       | -                         |                         |
|            |         | 300           | 0.30                        | 5.7                                      | 0.2                        | 17               | 0                |           |                                          |                                        |                                        | -                            | 5.5                        | -                          | -                           | 105.7                     | -                         | -                           | 4.4                       | -                         |                         |

HT Grade = Grade of hypertension observed. PPB  $f_u$  = fraction unbound based on human plasma protein binding. ND, not determined.

## References

Angevin E, Lopez-Martin JA, Lin CC, Gschwend JE, Harzstark A, Castellano D, *et al.* (2013). Phase I study of dovitinib (TKI258), an oral FGFR, VEGFR, and PDGFR inhibitor, in advanced or metastatic renal cell carcinoma. *Clin Cancer Res* 19: 1257-1268.

Aplenc R, Blaney SM, Strauss LC, Balis FM, Shusterman S, Ingle AM, *et al.* (2011). Pediatric phase I trial and pharmacokinetic study of dasatinib: a report from the children's oncology group phase I consortium. *J Clin Oncol* 29: 839-844.

Benjamin RS, Schoffski P, Hartmann JT, Van Oosterom A, Bui BN, Duyster J, *et al.* (2011). Efficacy and safety of motesanib, an oral inhibitor of VEGF, PDGF, and Kit receptors, in patients with imatinib-resistant gastrointestinal stromal tumors. *Cancer Chemother Pharmacol* 68: 69-77.

Chen Y, Rini BI, Bair AH, Mugundu GM, & Pithavala YK (2015). Population pharmacokinetic-pharmacodynamic modelling of 24-h diastolic ambulatory blood pressure changes mediated by axitinib in patients with metastatic renal cell carcinoma. *Clin Pharmacokinet* 54: 397-407.

Clark JW, Eder JP, Ryan D, Lathia C, & Lenz HJ (2005). Safety and pharmacokinetics of the dual action Raf kinase and vascular endothelial growth factor receptor inhibitor, BAY 43-9006, in patients with advanced, refractory solid tumors. *Clin Cancer Res* 11: 5472-5480.

Demetri GD, Lo Russo P, MacPherson IR, Wang D, Morgan JA, Brunton VG, *et al.* (2009). Phase I dose-escalation and pharmacokinetic study of dasatinib in patients with advanced solid tumors. *Clin Cancer Res* 15: 6232-6240.

Eder JP, Shapiro GI, Appleman LJ, Zhu AX, Miles D, Keer H, *et al.* (2010). A phase I study of foretinib, a multi-targeted inhibitor of c-Met and vascular endothelial growth factor receptor 2. *Clin Cancer Res* 16: 3507-3516.

Eisen T, Joensuu H, Nathan PD, Harper PG, Wojtukiewicz MZ, Nicholson S, *et al.* (2012). Regorafenib for patients with previously untreated metastatic or unresectable renal-cell carcinoma: a single-group phase 2 trial. *Lancet Oncol* 13: 1055-1062.

Engle SK, & Watson DE (2016). Natriuretic Peptides as Cardiovascular Safety Biomarkers in Rats: Comparison With Blood Pressure, Heart Rate, and Heart Weight. *Toxicol Sci* 149: 458-472.

Eskens FA, Steeghs N, Verweij J, Bloem JL, Christensen O, van Doorn L, *et al.* (2009). Phase I dose escalation study of telatinib, a tyrosine kinase inhibitor of vascular endothelial growth factor receptor 2 and 3, platelet-derived growth factor receptor beta, and c-Kit, in patients with advanced or metastatic solid tumors. *J Clin Oncol* 27: 4169-4176.

Faivre S, Delbaldo C, Vera K, Robert C, Lozahic S, Lassau N, *et al.* (2006). Safety, pharmacokinetic, and antitumor activity of SU11248, a novel oral multitarget tyrosine kinase inhibitor, in patients with cancer. *J Clin Oncol* 24: 25-35.

Fujisaka Y, Yamada Y, Yamamoto N, Shimizu T, Fujiwara Y, Yamada K, *et al.* (2010). Phase 1 study of the investigational, oral angiogenesis inhibitor motesanib in Japanese patients with advanced solid tumors. *Cancer Chemother Pharmacol* 66: 935-943.

Fukudo M, Ito T, Mizuno T, Shinsako K, Hatano E, Uemoto S, *et al.* (2014). Exposure-toxicity relationship of sorafenib in Japanese patients with renal cell carcinoma and hepatocellular carcinoma. *Clin Pharmacokinet* 53: 185-196.

Hannon RA, Clack G, Rimmer M, Swaisland A, Lockton JA, Finkelman RD, *et al.* (2010). Effects of the Src kinase inhibitor saracatinib (AZD0530) on bone turnover in healthy men: a randomized, double-blind, placebo-controlled, multiple-ascending-dose phase I trial. *J Bone Miner Res* 25: 463-471.

Herbst RS, Johnson DH, Mininberg E, Carbone DP, Henderson T, Kim ES, *et al.* (2005). Phase I/II trial evaluating the anti-vascular endothelial growth factor monoclonal antibody bevacizumab in combination with the HER-1/epidermal growth factor receptor tyrosine kinase inhibitor erlotinib for patients with recurrent non-small-cell lung cancer. *J Clin Oncol* 23: 2544-2555.

Houk BE, Bello CL, Poland B, Rosen LS, Demetri GD, & Motzer RJ (2010). Relationship between exposure to sunitinib and efficacy and tolerability endpoints in patients with cancer: results of a pharmacokinetic/pharmacodynamic meta-analysis. *Cancer Chemother Pharmacol* 66: 357-371.

Hurwitz HI, Dowlati A, Saini S, Savage S, Suttle AB, Gibson DM, *et al.* (2009). Phase I trial of pazopanib in patients with advanced cancer. *Clin Cancer Res* 15: 4220-4227.

Jonker DJ, Rosen LS, Sawyer MB, de Braud F, Wilding G, Sweeney CJ, *et al.* (2011). A phase I study to determine the safety, pharmacokinetics and pharmacodynamics of a dual VEGFR and FGFR inhibitor, brivanib, in patients with advanced or metastatic solid tumors. *Ann Oncol* 22: 1413-1419.

Kantarjian H, Giles F, Wunderle L, Bhalla K, O'Brien S, Wassmann B, *et al.* (2006). Nilotinib in imatinib-resistant CML and Philadelphia chromosome-positive ALL. *N Engl J Med* 354: 2542-2551.

Khosravan R, Motzer RJ, Fumagalli E, & Rini BI (2016). Population Pharmacokinetic/Pharmacodynamic Modeling of Sunitinib by Dosing Schedule in Patients with Advanced Renal Cell Carcinoma or Gastrointestinal Stromal Tumor. *Clin Pharmacokinet* 55: 1251-1269.

Lewis NL, Lewis LD, Eder JP, Reddy NJ, Guo F, Pierce KJ, *et al.* (2009). Phase I study of the safety, tolerability, and pharmacokinetics of oral CP-868,596, a highly specific platelet-derived growth factor receptor tyrosine kinase inhibitor in patients with advanced cancers. *J Clin Oncol* 27: 5262-5269.

Lindauer A, Di Gion P, Kanefendt F, Tomalik-Scharte D, Kinzig M, Rodamer M, *et al.* (2010). Pharmacokinetic/pharmacodynamic modeling of biomarker response to sunitinib in healthy volunteers. *Clin Pharmacol Ther* 87: 601-608.

Locati LD, Licitra L, Agate L, Ou SH, Boucher A, Jarzab B, *et al.* (2014). Treatment of advanced thyroid cancer with axitinib: Phase 2 study with pharmacokinetic/pharmacodynamic and quality-of-life assessments. *Cancer* 120: 2694-2703.

Lockhart AC, Cropp GF, Berlin JD, Donnelly E, Schumaker RD, Schaaf LJ, *et al.* (2006). Phase I/pilot study of SU5416 (semaxinib) in combination with irinotecan/bolus 5-FU/LV (IFL) in patients with metastatic colorectal cancer. *Am J Clin Oncol* 29: 109-115.



Mross K, Frost A, Steinbild S, Hedbom S, Buchert M, Fasol U, *et al.* (2012). A phase I dose-escalation study of regorafenib (BAY 73-4506), an inhibitor of oncogenic, angiogenic, and stromal kinases, in patients with advanced solid tumors. *Clin Cancer Res* 18: 2658-2667.

Nakagawa K, Minami H, Kanezaki M, Mukaiyama A, Minamide Y, Uejima H, *et al.* (2009). Phase I dose-escalation and pharmacokinetic trial of lapatinib (GW572016), a selective oral dual inhibitor of ErbB-1 and -2 tyrosine kinases, in Japanese patients with solid tumors. *Jpn J Clin Oncol* 39: 116-123.

Niwakawa M, Yamaguchi R, Onozawa Y, Yasui H, Taku K, Naito T, *et al.* (2013). Phase I study of highly selective inhibitor of VEGFR tyrosine kinase, tivozanib, in Japanese patients with solid tumors. *Cancer Sci* 104: 1039-1044.

Reardon DA, Desjardins A, Vredenburgh JJ, Sathornsumetee S, Rich JN, Quinn JA, *et al.* (2008). Safety and pharmacokinetics of dose-intensive imatinib mesylate plus temozolomide: phase 1 trial in adults with malignant glioma. *Neuro Oncol* 10: 330-340.

Rosen LS, Kurzrock R, Mulay M, Van Vugt A, Purdom M, Ng C, *et al.* (2007). Safety, pharmacokinetics, and efficacy of AMG 706, an oral multikinase inhibitor, in patients with advanced solid tumors. *J Clin Oncol* 25: 2369-2376.

Rugo HS, Herbst RS, Liu G, Park JW, Kies MS, Steinfieldt HM, *et al.* (2005). Phase I trial of the oral antiangiogenesis agent AG-013736 in patients with advanced solid tumors: pharmacokinetic and clinical results. *J Clin Oncol* 23: 5474-5483.

Sarker D, Molife R, Evans TR, Hardie M, Marriott C, Butzberger-Zimmerli P, *et al.* (2008). A phase I pharmacokinetic and pharmacodynamic study of TKI258, an oral, multitargeted receptor tyrosine kinase inhibitor in patients with advanced solid tumors. *Clin Cancer Res* 14: 2075-2081.

Sawaki A, Yamada Y, Komatsu Y, Kanda T, Doi T, Koseki M, *et al.* (2010). Phase II study of motesanib in Japanese patients with advanced gastrointestinal stromal tumors with prior exposure to imatinib mesylate. *Cancer Chemother Pharmacol* 65: 961-967.

Schlumberger MJ, Elisei R, Bastholt L, Wirth LJ, Martins RG, Locati LD, *et al.* (2009). Phase II study of safety and efficacy of motesanib in patients with progressive or symptomatic, advanced or metastatic medullary thyroid cancer. *J Clin Oncol* 27: 3794-3801.

Shapiro GI, McCallum S, Adams LM, Sherman L, Weller S, Swann S, *et al.* (2013). A Phase 1 dose-escalation study of the safety and pharmacokinetics of once-daily oral foretinib, a multi-kinase inhibitor, in patients with solid tumors. *Invest New Drugs* 31: 742-750.

Sherman SI, Wirth LJ, Droz JP, Hofmann M, Bastholt L, Martins RG, *et al.* (2008). Motesanib diphosphate in progressive differentiated thyroid cancer. *N Engl J Med* 359: 31-42.

Shibata SI, Chung V, Synold TW, Longmate JA, Suttle AB, Ottesen LH, *et al.* (2013). Phase I study of pazopanib in patients with advanced solid tumors and hepatic dysfunction: a National Cancer Institute Organ Dysfunction Working Group study. *Clin Cancer Res* 19: 3631-3639.

Speed B, Bu HZ, Pool WF, Peng GW, Wu EY, Patyna S, *et al.* (2012). Pharmacokinetics, distribution, and metabolism of [14C]sunitinib in rats, monkeys, and humans. *Drug Metab Dispos* 40: 539-555.

Strumberg D, Clark JW, Awada A, Moore MJ, Richly H, Hendlitz A, *et al.* (2007). Safety, pharmacokinetics, and preliminary antitumor activity of sorafenib: a review of four phase I trials in patients with advanced refractory solid tumors. *Oncologist* 12: 426-437.

Thiessen B, Stewart C, Tsao M, Kamel-Reid S, Schaiquevich P, Mason W, *et al.* (2010). A phase I/II trial of GW572016 (lapatinib) in recurrent glioblastoma multiforme: clinical outcomes, pharmacokinetics and molecular correlation. *Cancer Chemother Pharmacol* 65: 353-361.

Wong CI, Koh TS, Soo R, Hartono S, Thng CH, McKeegan E, *et al.* (2009). Phase I and biomarker study of ABT-869, a multiple receptor tyrosine kinase inhibitor, in patients with refractory solid malignancies. *J Clin Oncol* 27: 4718-4726.

Yau T, Chen PJ, Chan P, Curtis CM, Murphy PS, Suttle AB, *et al.* (2011). Phase I dose-finding study of pazopanib in hepatocellular carcinoma: evaluation of early efficacy, pharmacokinetics, and pharmacodynamics. *Clin Cancer Res* 17: 6914-6923.

Zhang L, Li S, Zhang Y, Zhan J, Zou BY, Smith R, *et al.* (2011). Pharmacokinetics and tolerability of vandetanib in Chinese patients with solid, malignant tumors: an open-label, phase I, rising multiple-dose study. *Clin Ther* 33: 315-327.

**AZ1 test occasion 1 450 mg/kg**

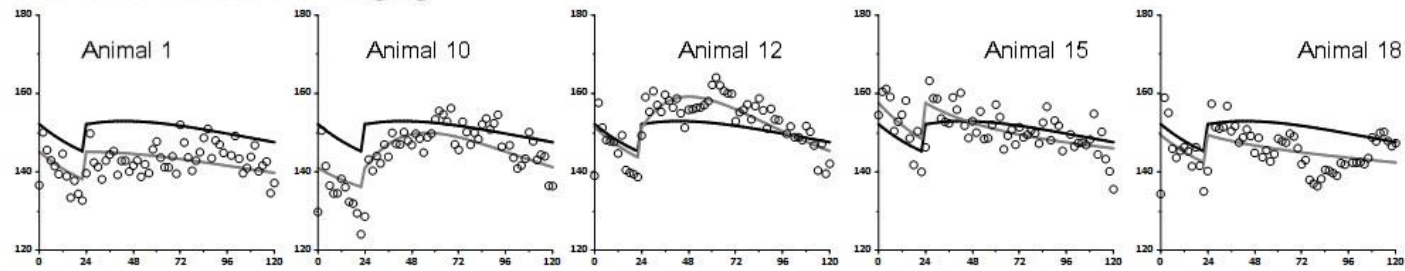

**AZ1 test occasion 2 10 mg/kg**

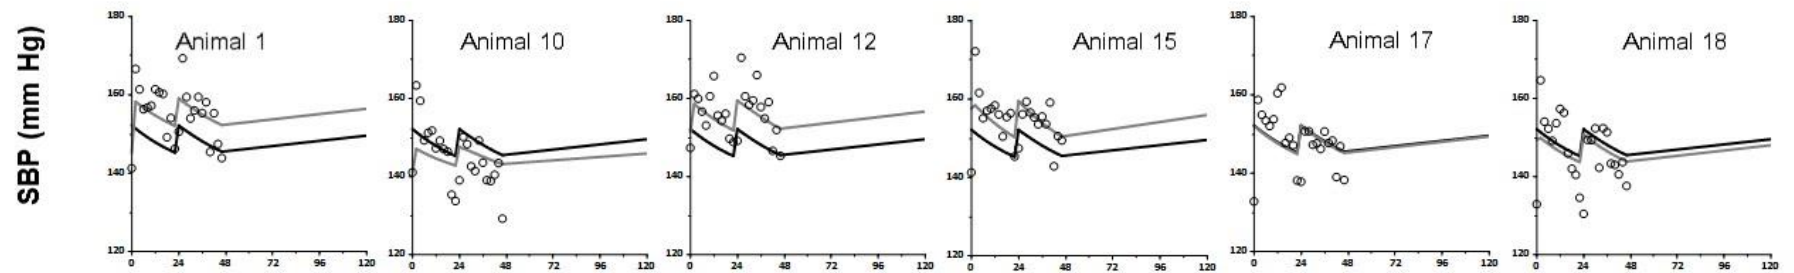

**AZ1 test occasion 3 100 mg/kg**

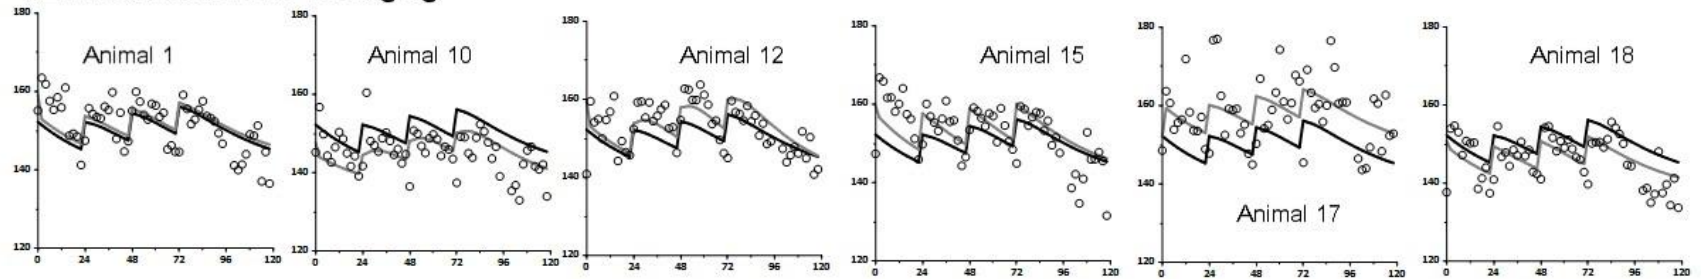

**Time (hr)**

Supplementary Figure 1. Observed systolic blood pressure (SBP) over time following dosing of vehicle and AZ1 to male Han Wistar rats, versus the individual and population PKPD model fit for each animal. The black circles indicate the observations the population model fit is represented as the black line, the individual model fit as the grey line. Top row for test occasion 1 high dose (450 mg/kg), middle row for test occasion 2 low dose (10 mg/kg) and bottom row for test occasion 3 mid dose (100 mg/kg).

### Regorafenib test occasion 1 8 mg/kg

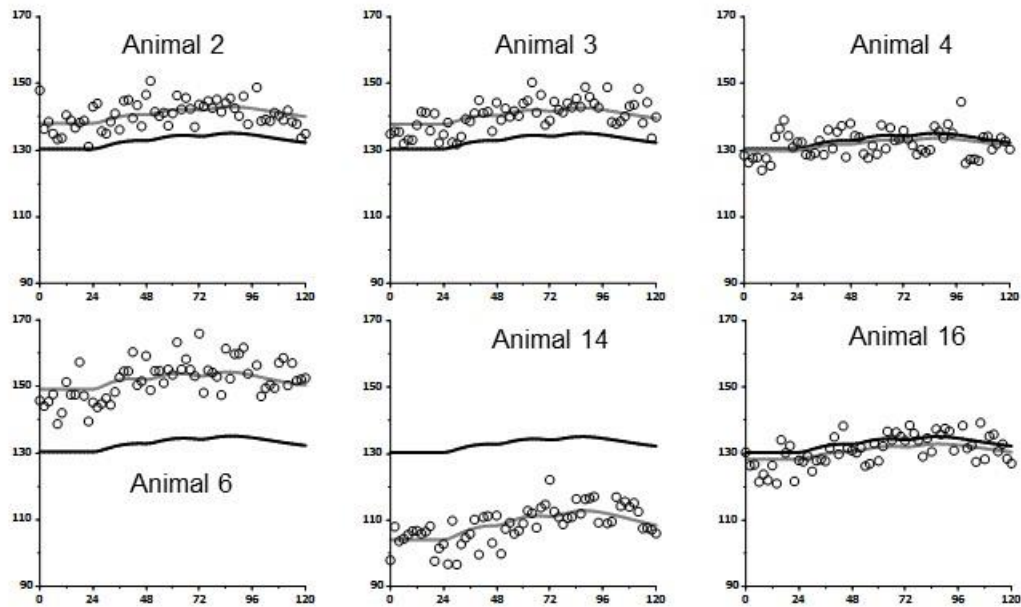

### Regorafenib test occasion 2 16 mg/kg

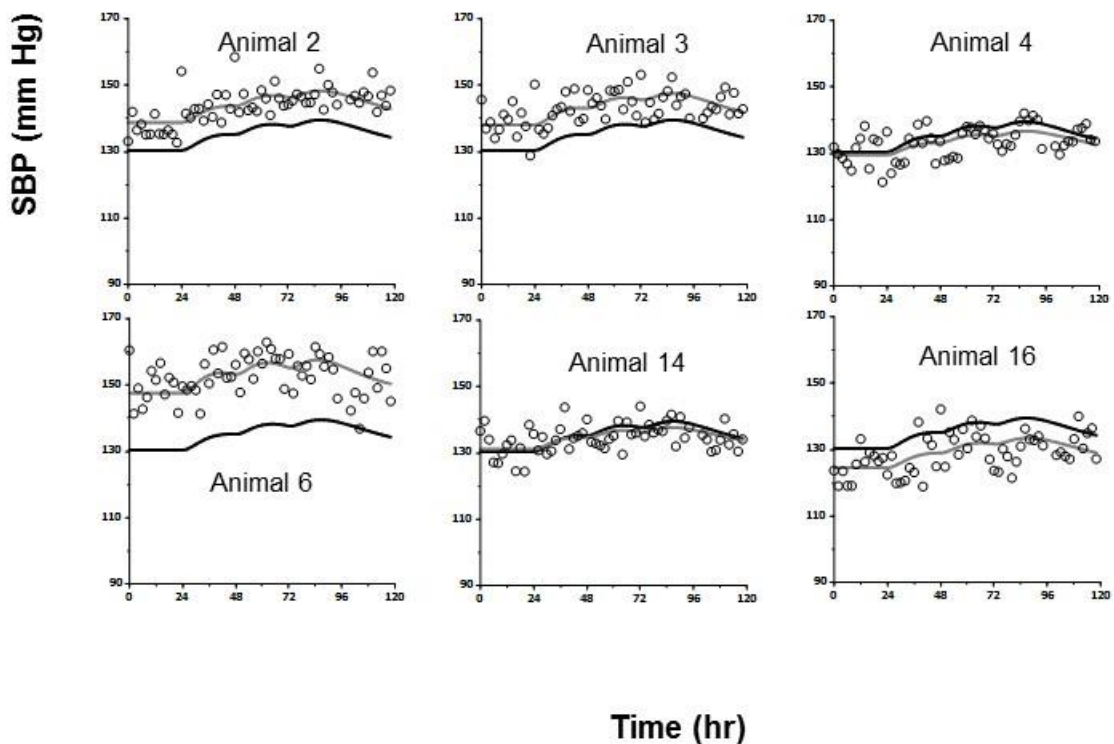

Supplementary Figure 2. Observed systolic blood pressure (SBP) over time following dosing of vehicle and regorafenib to male Han Wistar rats, versus the individual and population PKPD model fit for each animal. The black circles indicate the observations the population model fit is represented as the black line, the individual model fit as the grey line. Top panel for test occasion 1 low dose (8 mg/kg) and bottom panel for test occasion 2 high dose (16 mg/kg) as indicated.

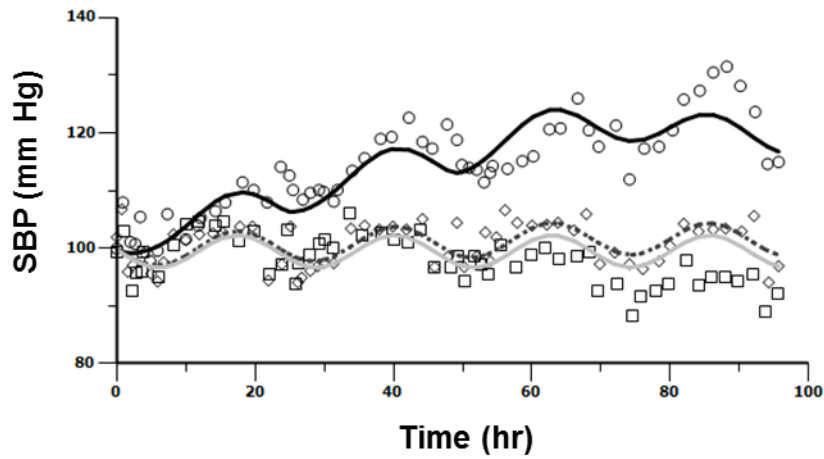

Supplementary Figure 3. Observed mean aortic blood pressure (MBP) over time following repeated daily dosing of vehicle, 5 and 50 mg/kg of sunitinib in male Sprague Dawley rats (n=4), versus the PKPD model fit. The dots indicate the observations after vehicle (diamonds), 5 mg/kg (squares) and 50 mg/kg, the model fit for vehicle represented as grey line, 5 mg/kg in dashed black line, 50 mg/kg as solid black line. Data-points extracted from (Engle & Watson, 2016; Speed et al., 2012).
